# Supplementary material for: Enrichment of Anaerobic Microbial Communities from Midgut and Hindgut of Sun Beetle Larvae (Pachnoda marginata) on Wheat Straw: Effect of Inoculum Preparation
Source: MDPI journal article supplement (doi:10.3390/microorganisms10040761), 2022-03-31
Supplement: s1 [file s1]

**Supplementary material:**

**Alpha-diversity of the bacterial communities**

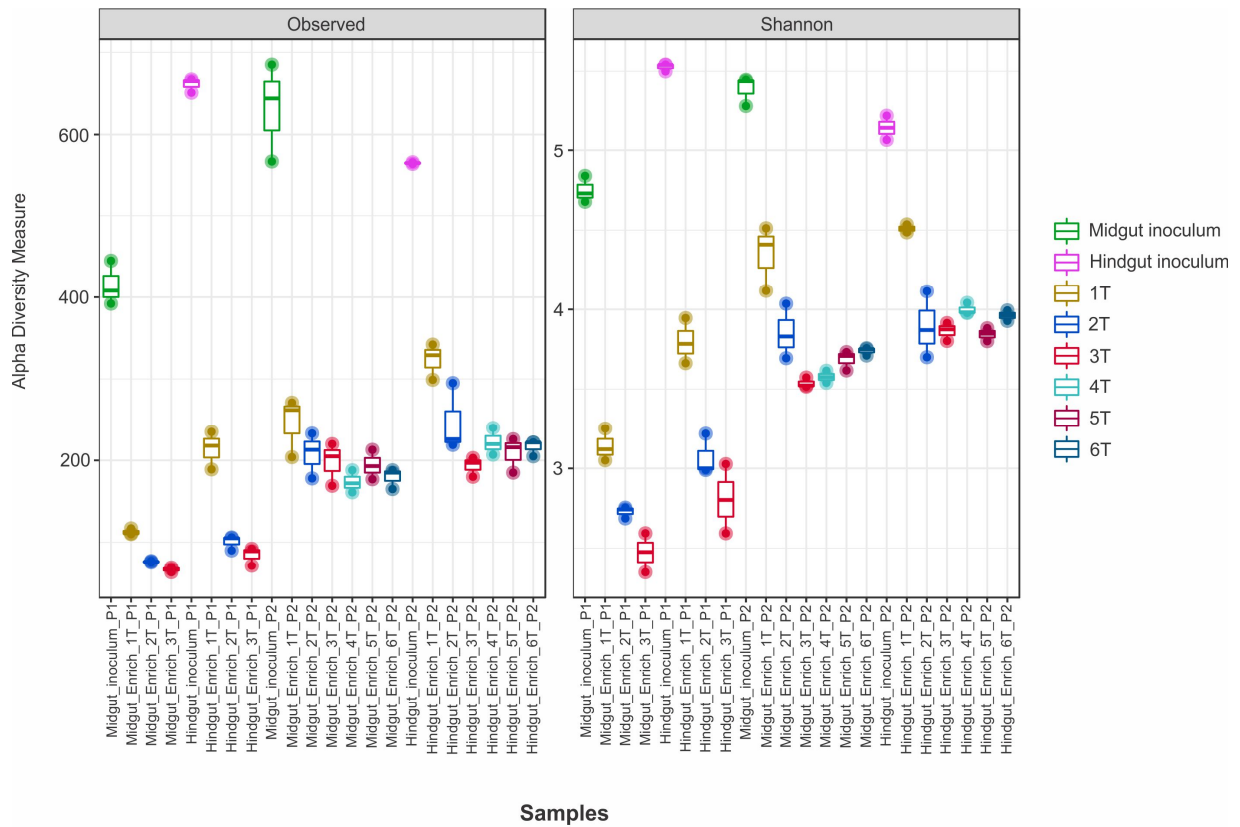

**Figure S1.** Alpha-diversity metrics of inocula, and enrichment culture transfer samples (1T-6T) derived from inoculum preparation procedure 1 (P1) and 2 (P2), based on 16S rRNA gene amplicon sequences ( $n = 3$ ).

## Alpha-diversity of methanogenic communities

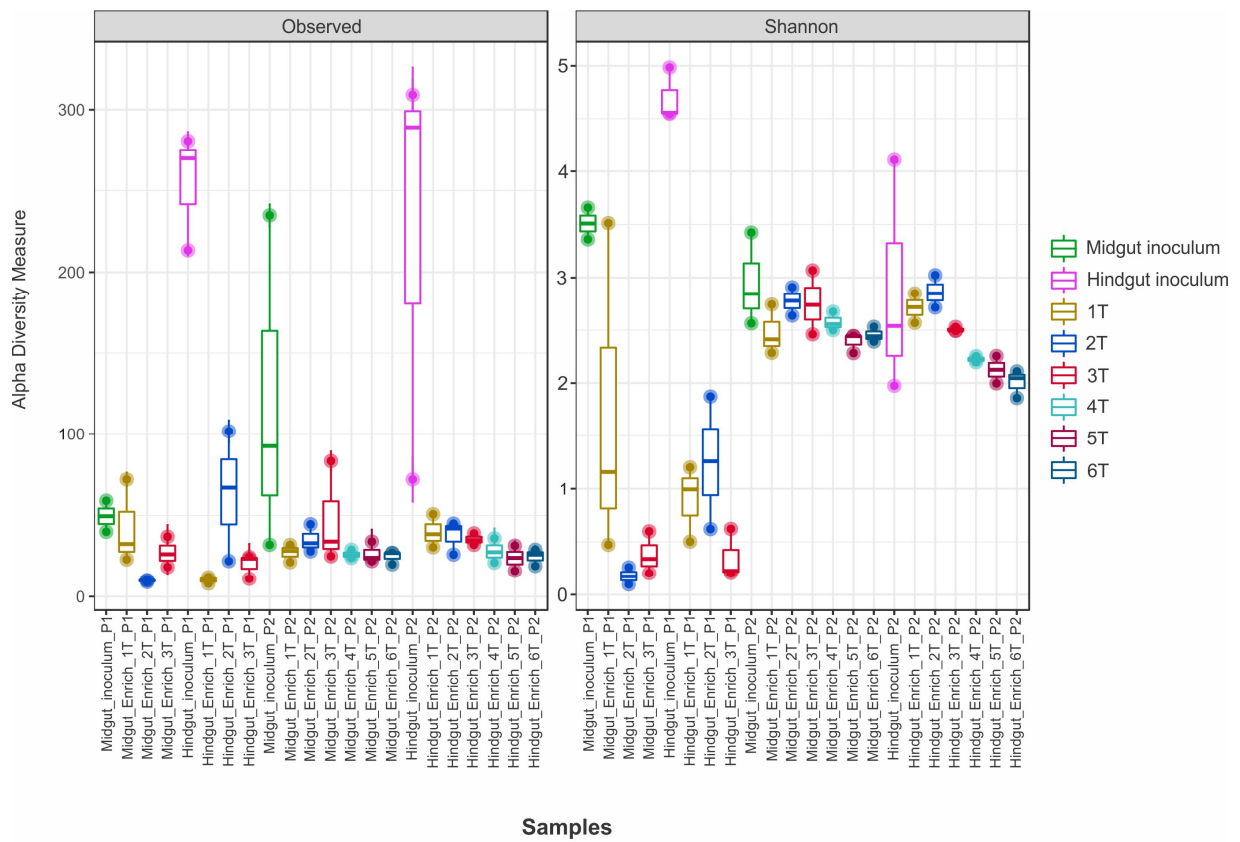

**Figure S2.** Alpha-diversity metrics of inocula, and enrichment culture transfer samples (1T-6T) derived from inoculum preparation procedure 1 (P1) and 2 (P2), based on *mcrA* gene amplicon sequences (n = 3).
